# Supplementary material for: Diurnal evolution of non-precipitating marine stratocumuli in a large-eddy simulation ensemble
Source: Copernicus journal article supplement (doi:10.5194/acp-24-12661-2024), 2024-11-14
Supplement: Supplementary file 1 [file acp-24-12661-2024-supplement.pdf]

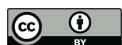

*Supplement of*

## **Diurnal evolution of non-precipitating marine stratocumuli in a large-eddy simulation ensemble**

**Yao-Sheng Chen et al.**

*Correspondence to:* Yao-Sheng Chen ([yaosheng.chen@noaa.gov](mailto:yaosheng.chen@noaa.gov))

The copyright of individual parts of the supplement might differ from the article licence.

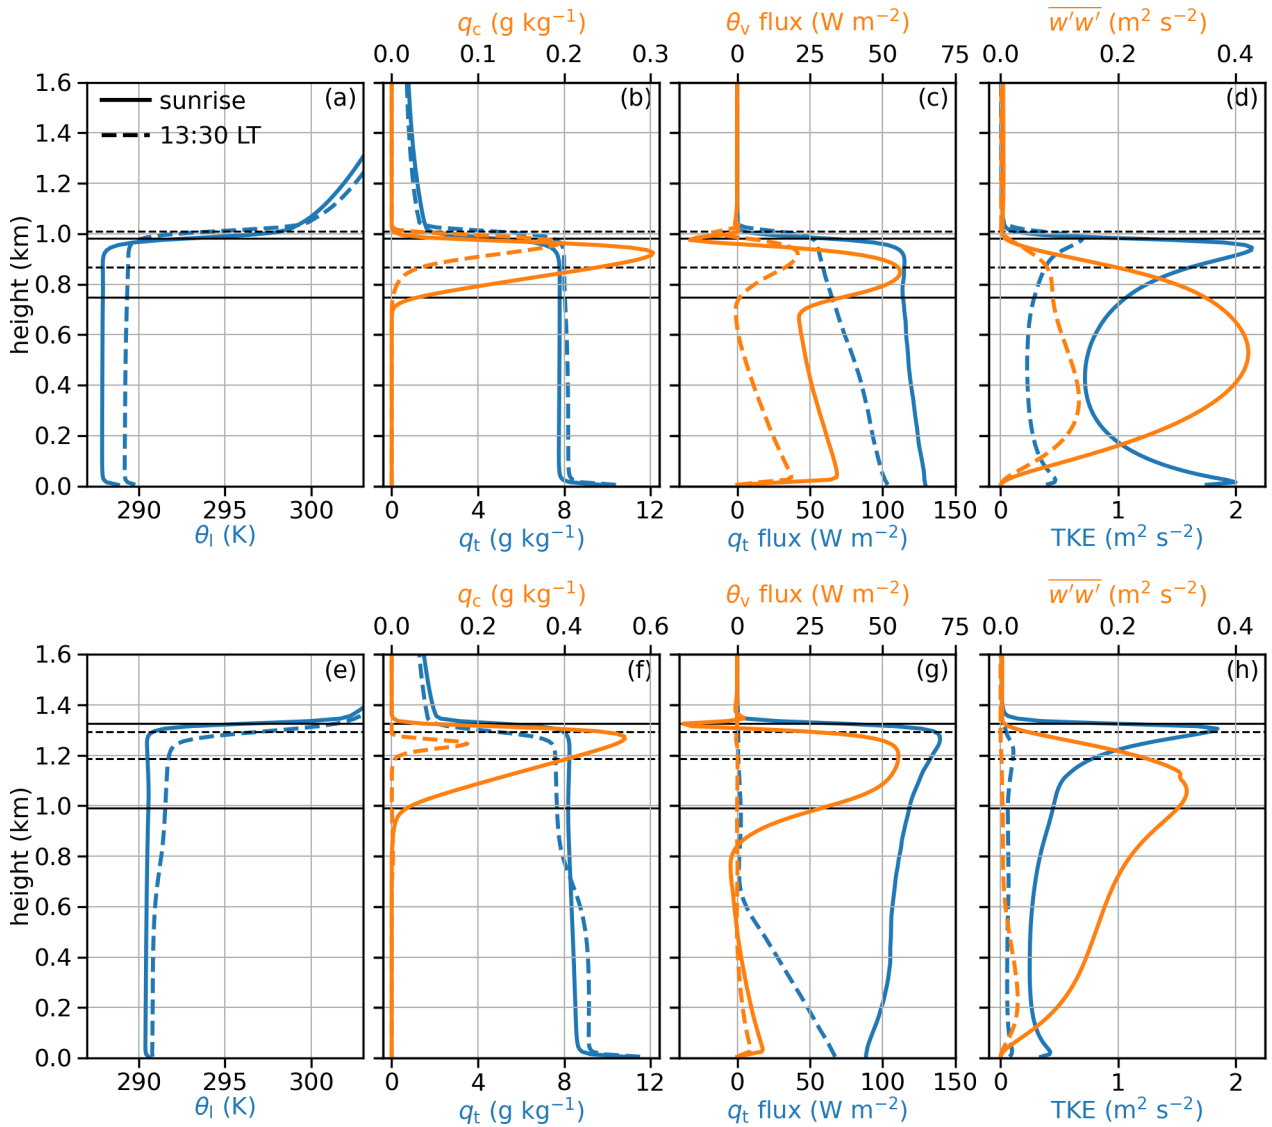

**Figure S1.** Profiles of liquid water potential temperature ( $\theta_l$ ), total water mixing ratio ( $q_t$ ), cloud water mixing ratio ( $q_c$ ),  $q_t$  flux, virtual potential temperature ( $\theta_v$ ) flux, TKE, and variance of vertical velocity ( $\overline{w'w'}$ ) for one case from the loDloL category (upper row) and one from the hiDloL category (lower row) at sunrise (solid lines) and 13:30 LT (dashed lines). Horizontal back lines indicate  $z_i$  and  $z_{cb}$ .

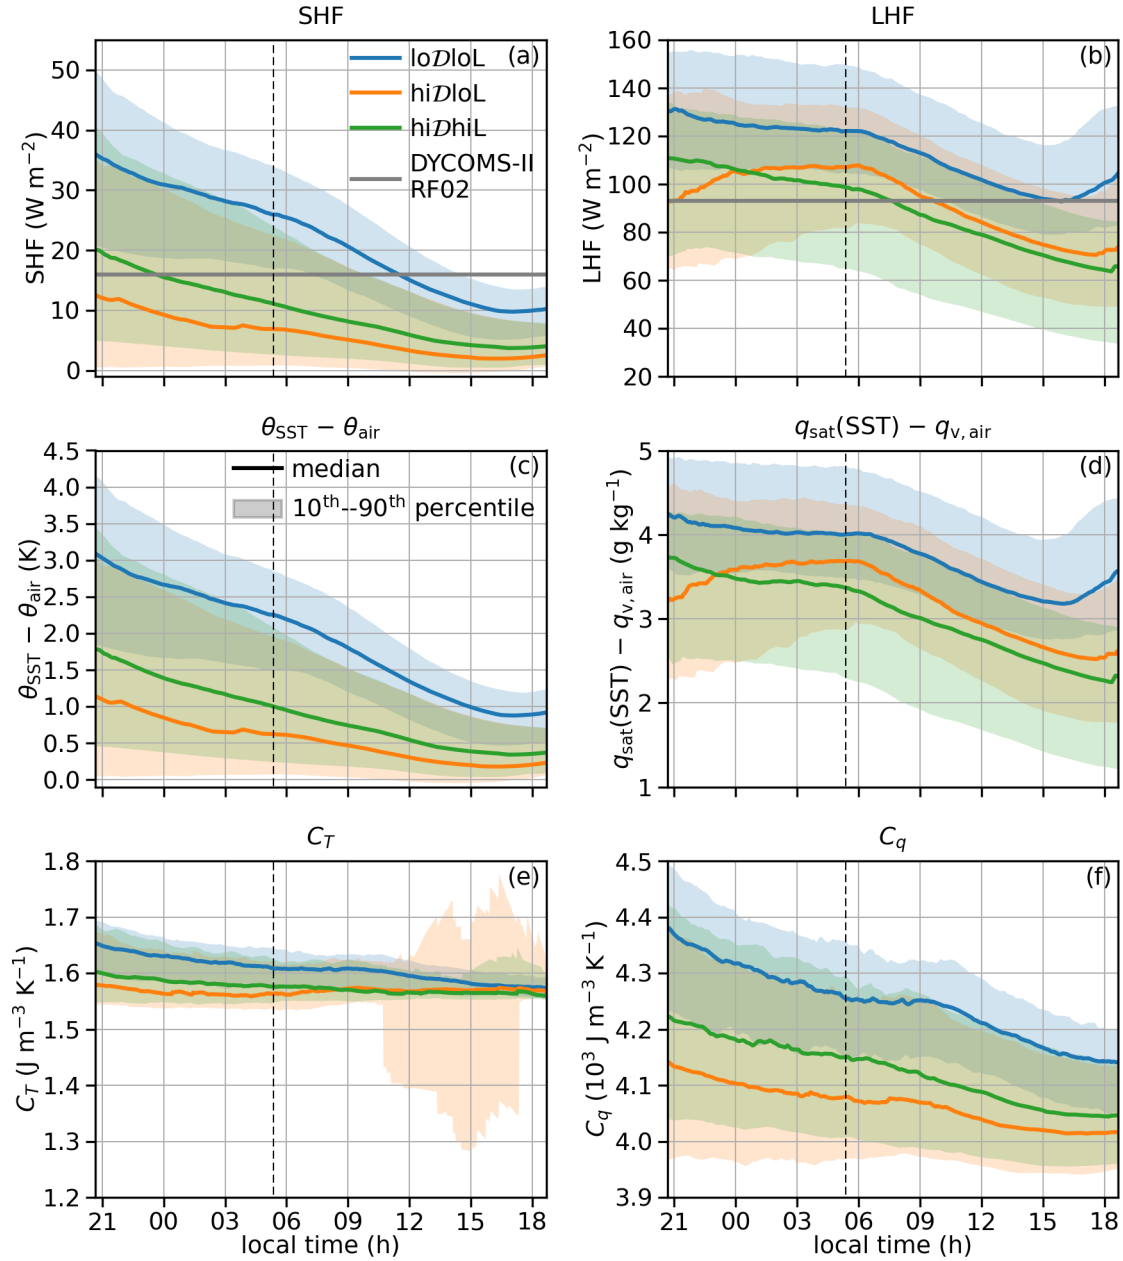

**Figure S2.** Time series of (a) surface sensible heat flux (SHF), (b) surface latent heat flux (LHF), (c) difference between potential temperature based on sea surface temperature ( $\theta_{\text{SST}}$ ) and lowest model level air potential temperature ( $\theta_{\text{air}}$ ), (d) difference between saturation mixing ratio at SST ( $q_{\text{sat}}(\text{SST})$ ) and lowest model level water vapor mixing ratio ( $q_{\text{v,air}}$ ), (e) transfer coefficient for SHF ( $C_T$ ), and (f) wind speed used for surface fluxes calculation ( $U$ ) by category. The vertical dashed black lines indicate sunrise.

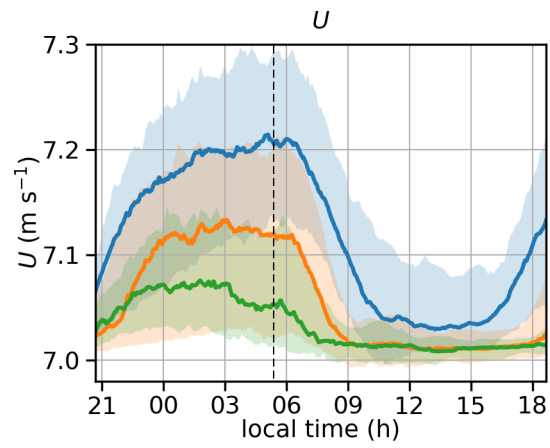

**Figure S3.** Same as Figure S2 but for the wind speed used for surface flux calculation ( $U$ ). See Figure S2 for legends.

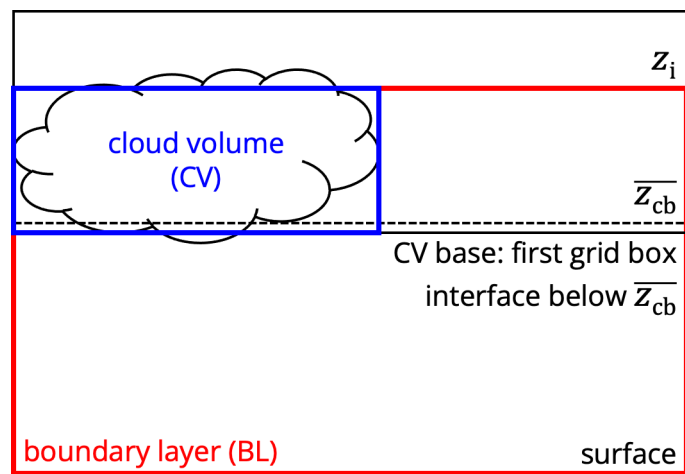

**Figure S4.** A sketch showing the definition of a cloud volume for budget analysis.

LWP<sub>c</sub> budget based on BL  $\langle \theta_l \rangle$  and  $\langle q_t \rangle$  budgets  
for ENTR and SUBS

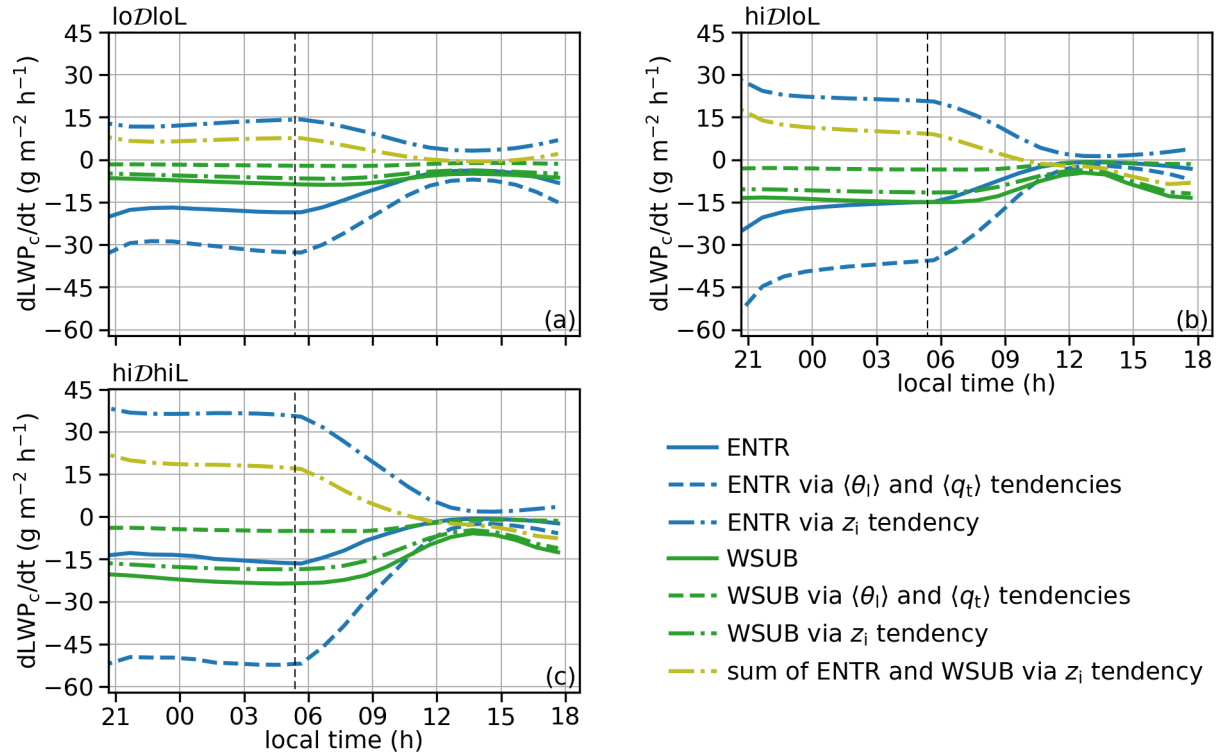

Figure S5. LWP budget terms for ENTR and SUBS based on BL  $\langle \theta_l \rangle$  and  $\langle q_t \rangle$  budgets.

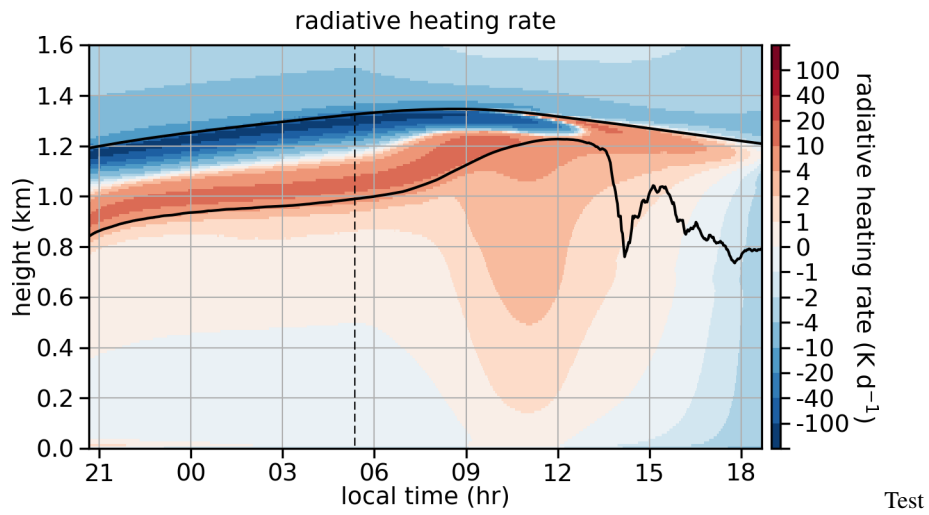

**Figure S6.** Evolution of radiative heating rate profile for the same hiDloL case shown in the lower row of Figure S1. The black curves indicate  $z_1$  and  $z_{cb}$ . The vertical dashed black line indicates sunrise.

LWP<sub>c</sub> budget based on CV  $\langle \theta_l \rangle$  and  $\langle q_t \rangle$  budgets  
for ENTR and SUBS

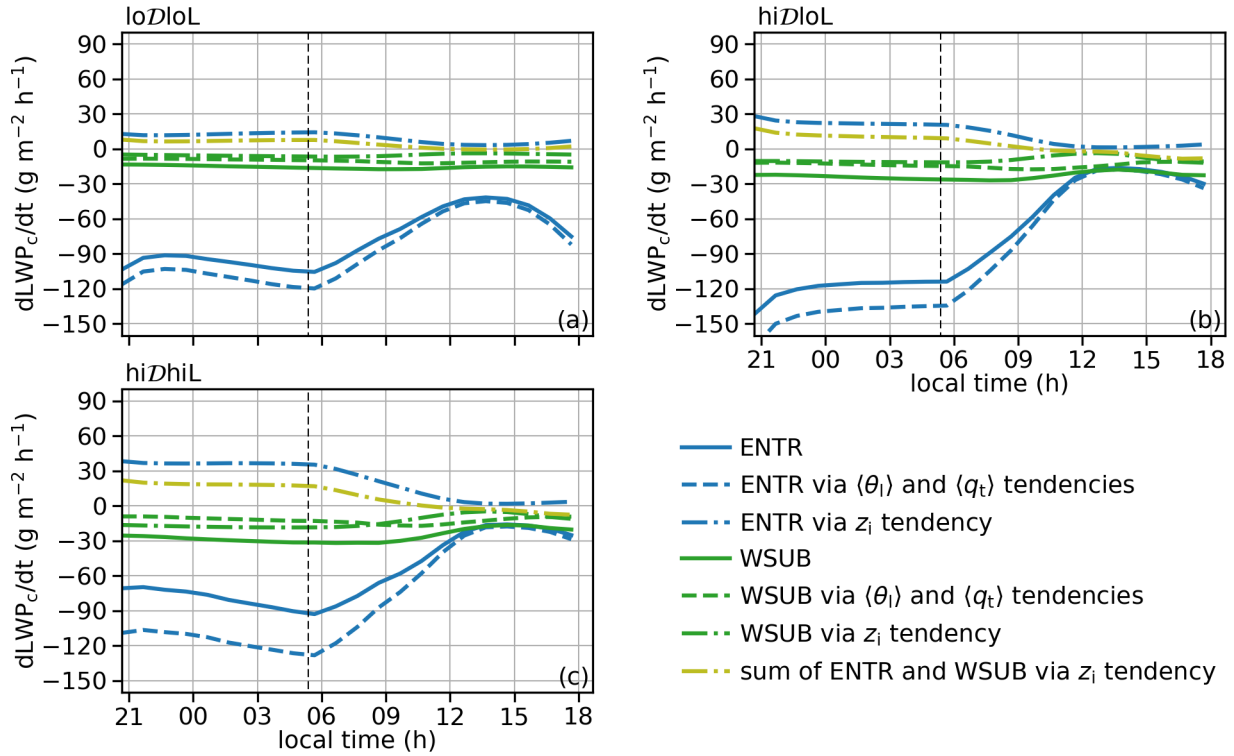

**Figure S7.** LWP budget terms for ENTR and SUBS based on CV  $\langle \theta_l \rangle$  and  $\langle q_t \rangle$  budgets.



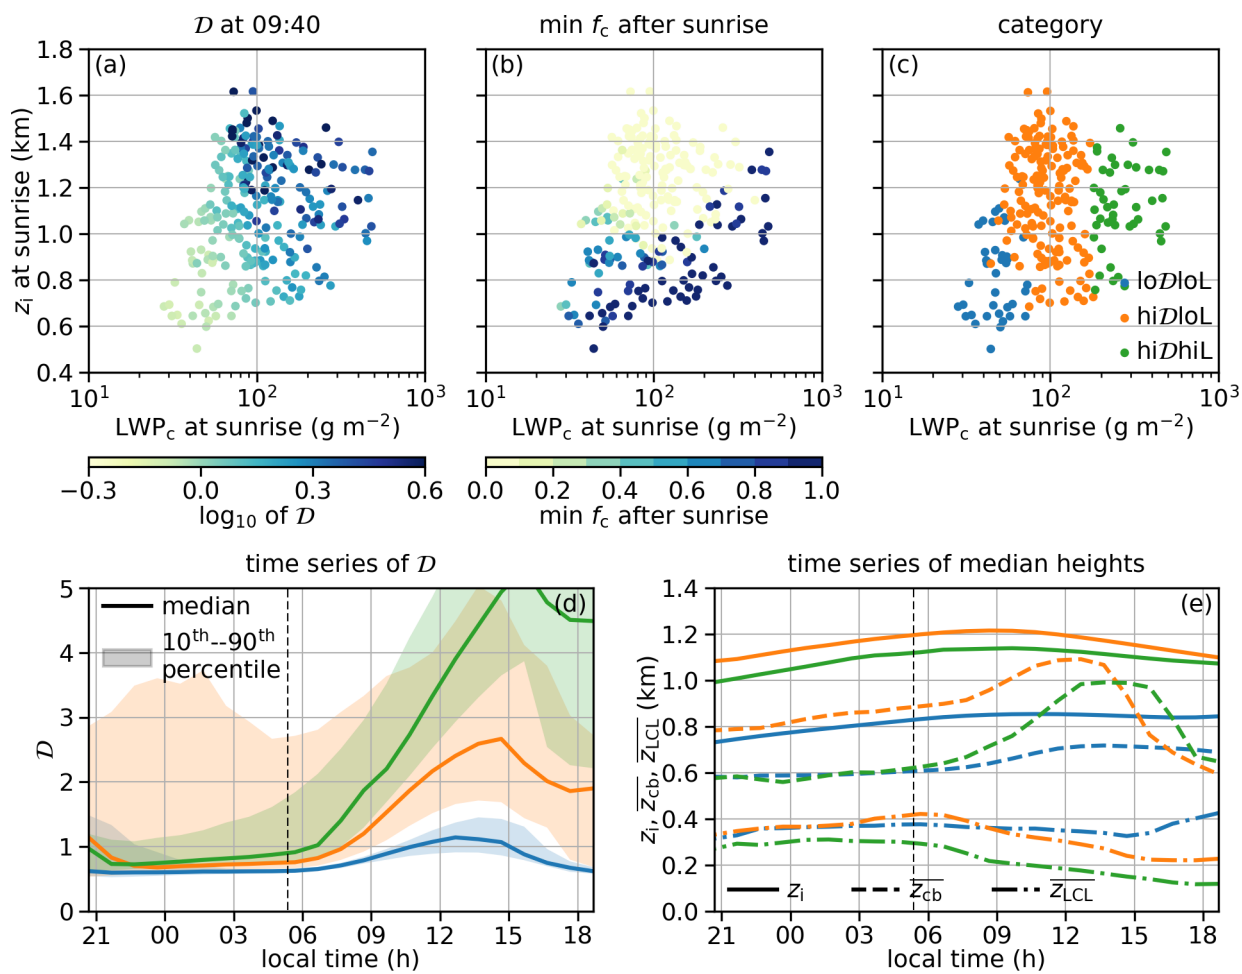

**Figure S8.** Same as Figure 2 but for the SST0.5K+ set.

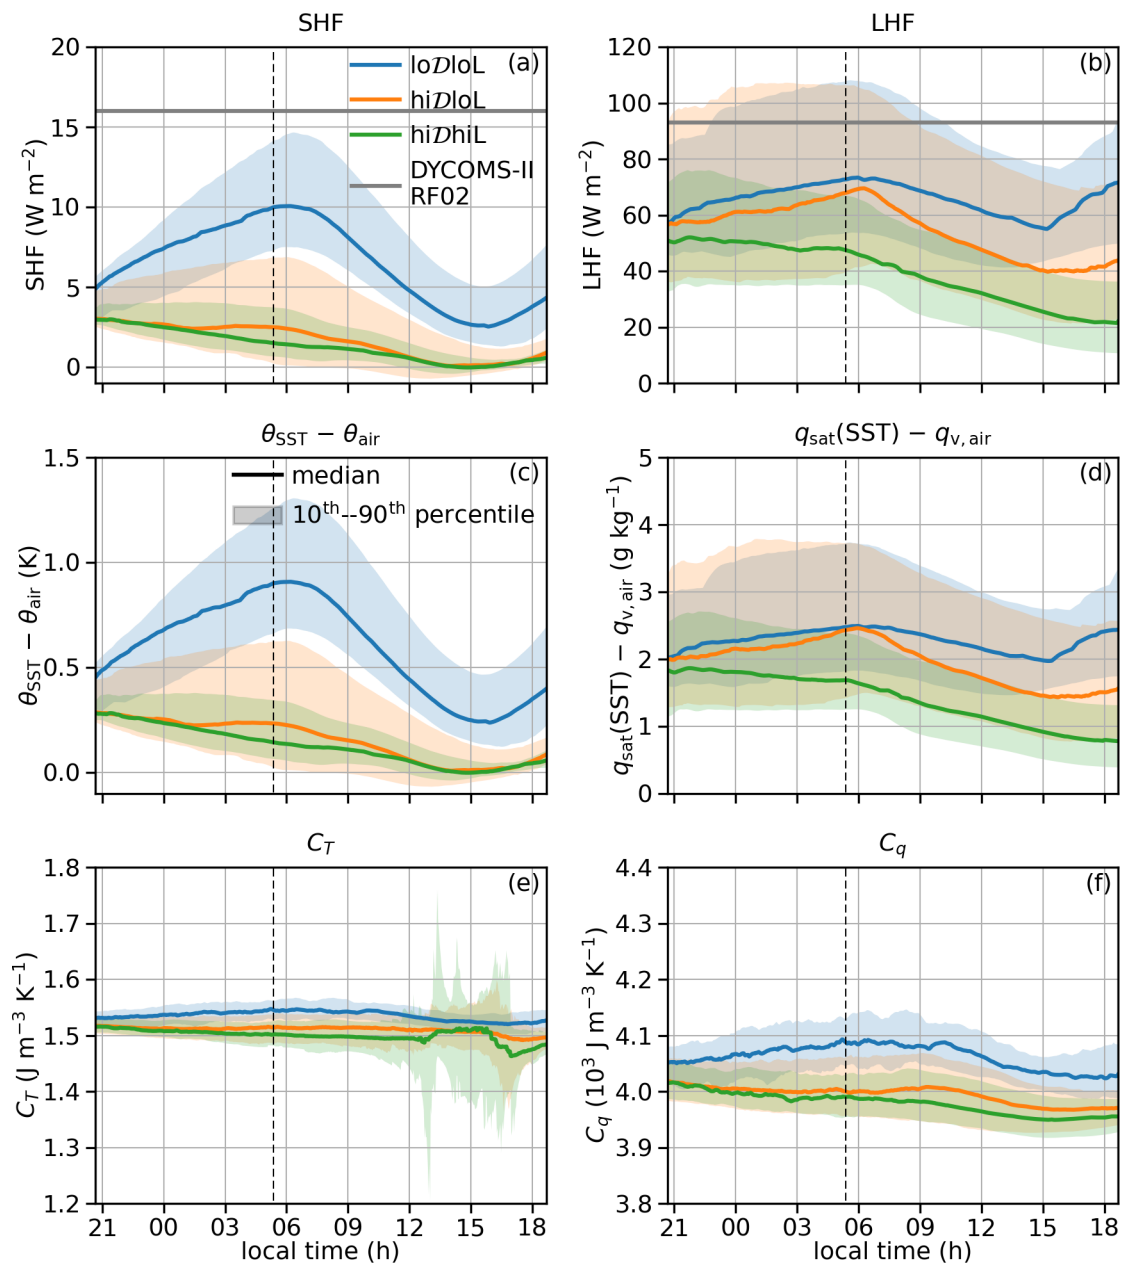

**Figure S9.** Same as Figure S2 but for the SST0.5K+ set.

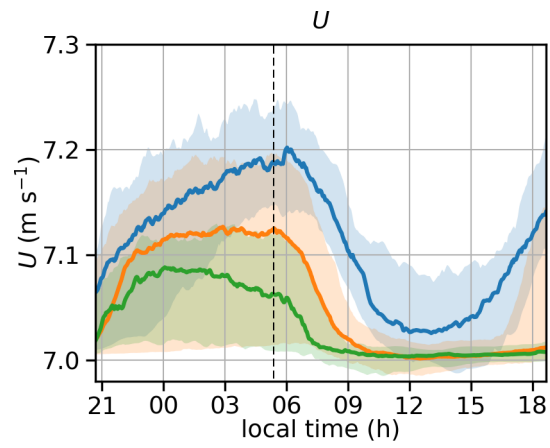

**Figure S10.** Same as Figure S3 but for the SST0.5K+ set.

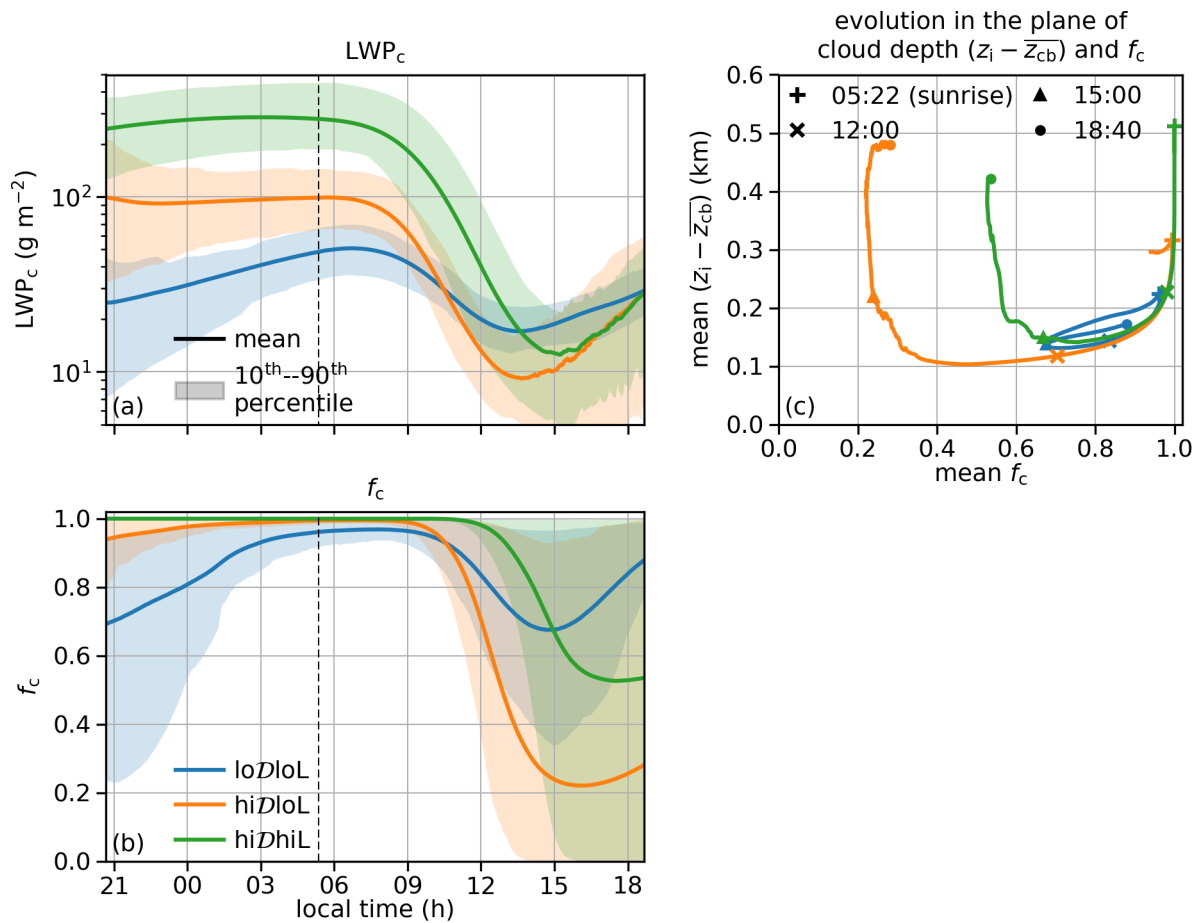

**Figure S11.** Same as Figure 3 but for the SST0.5K+ set.

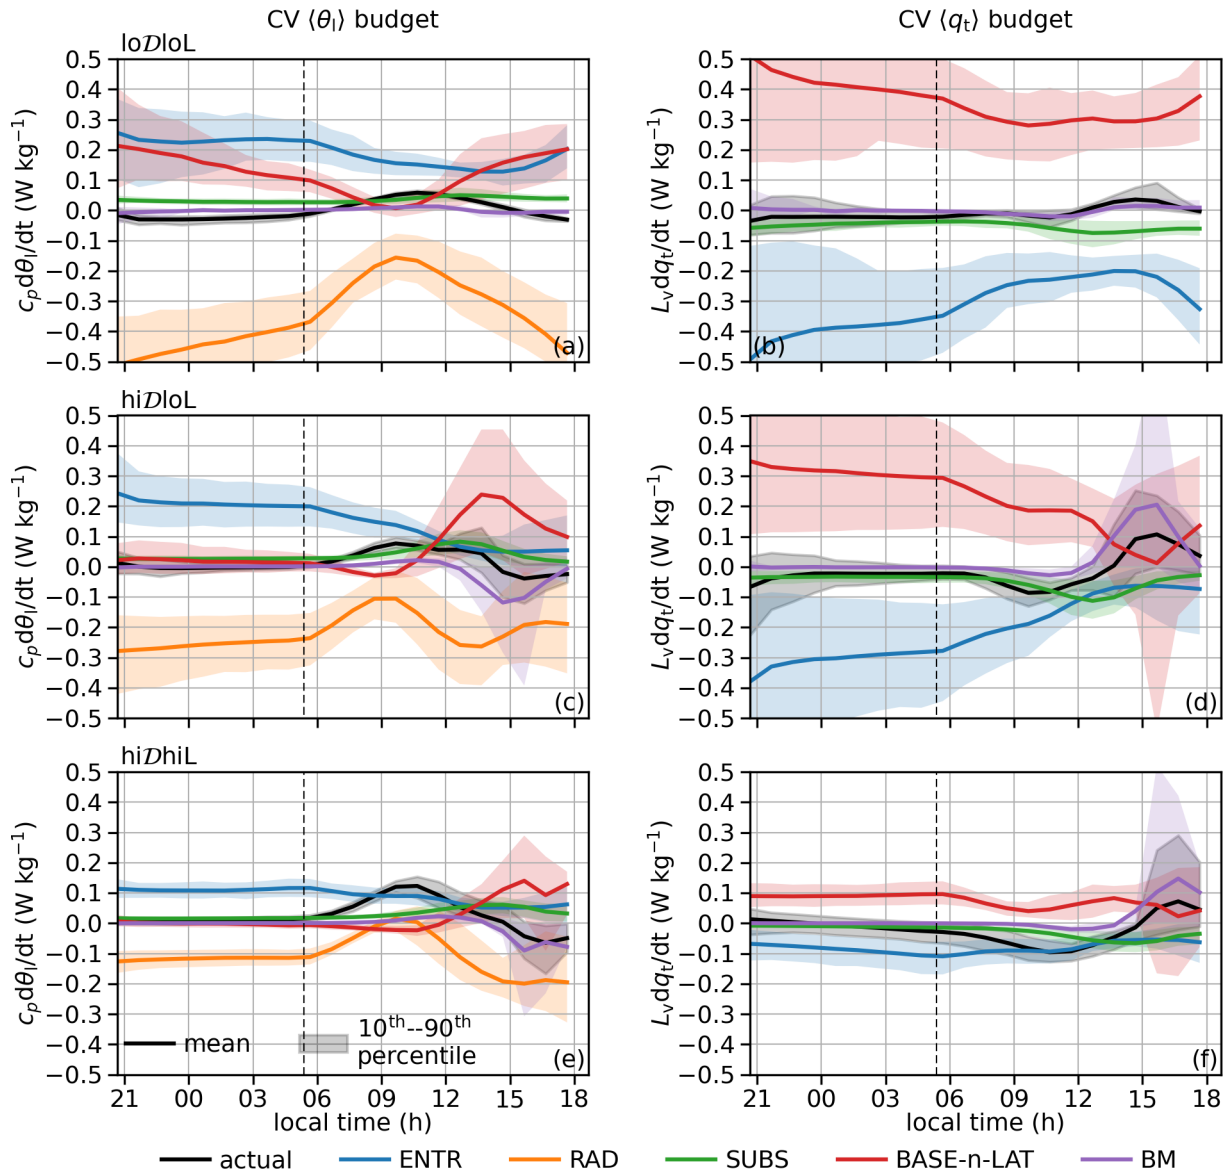

Figure S12. Same as Figure 6 but for the SST0.5K+ set.

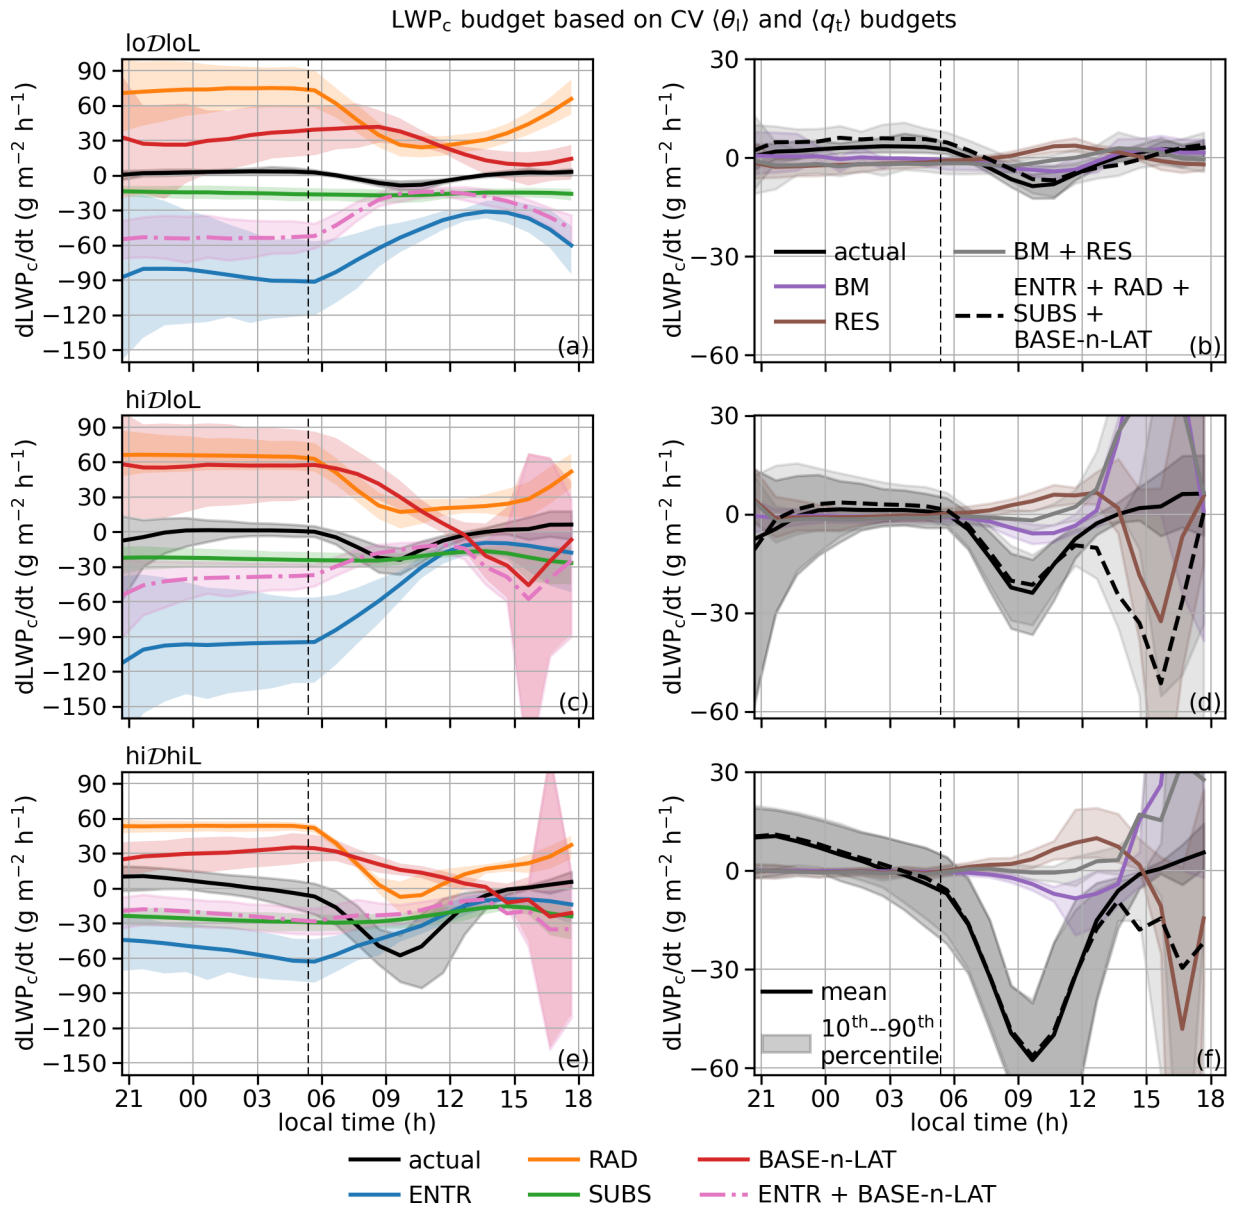

**Figure S13.** Same as Figure 7 but for the SST0.5K+ set.

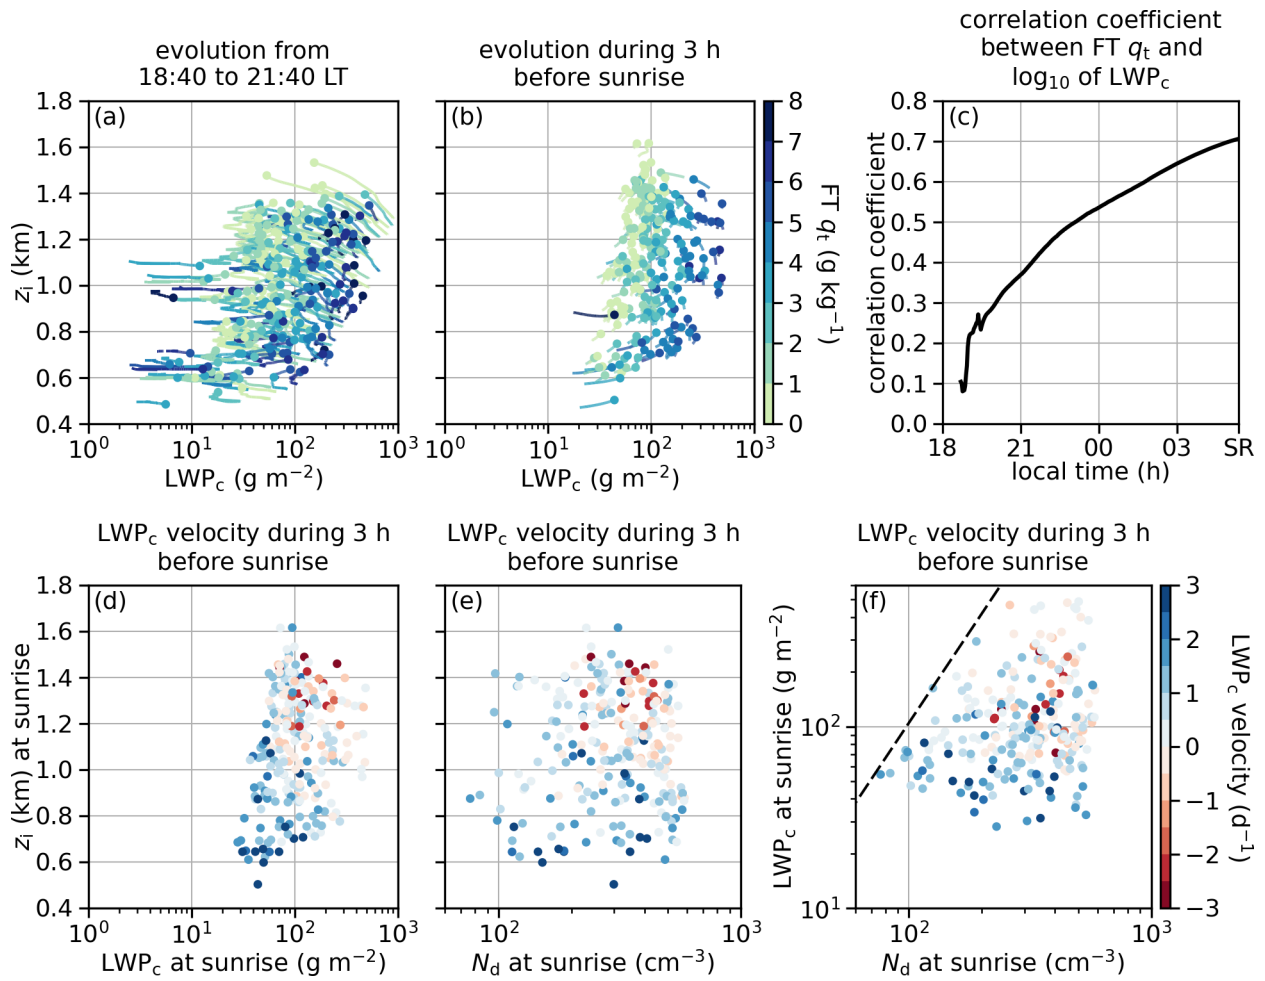

**Figure S14.** Same as Figure 8 but for the SST0.5K+ set.

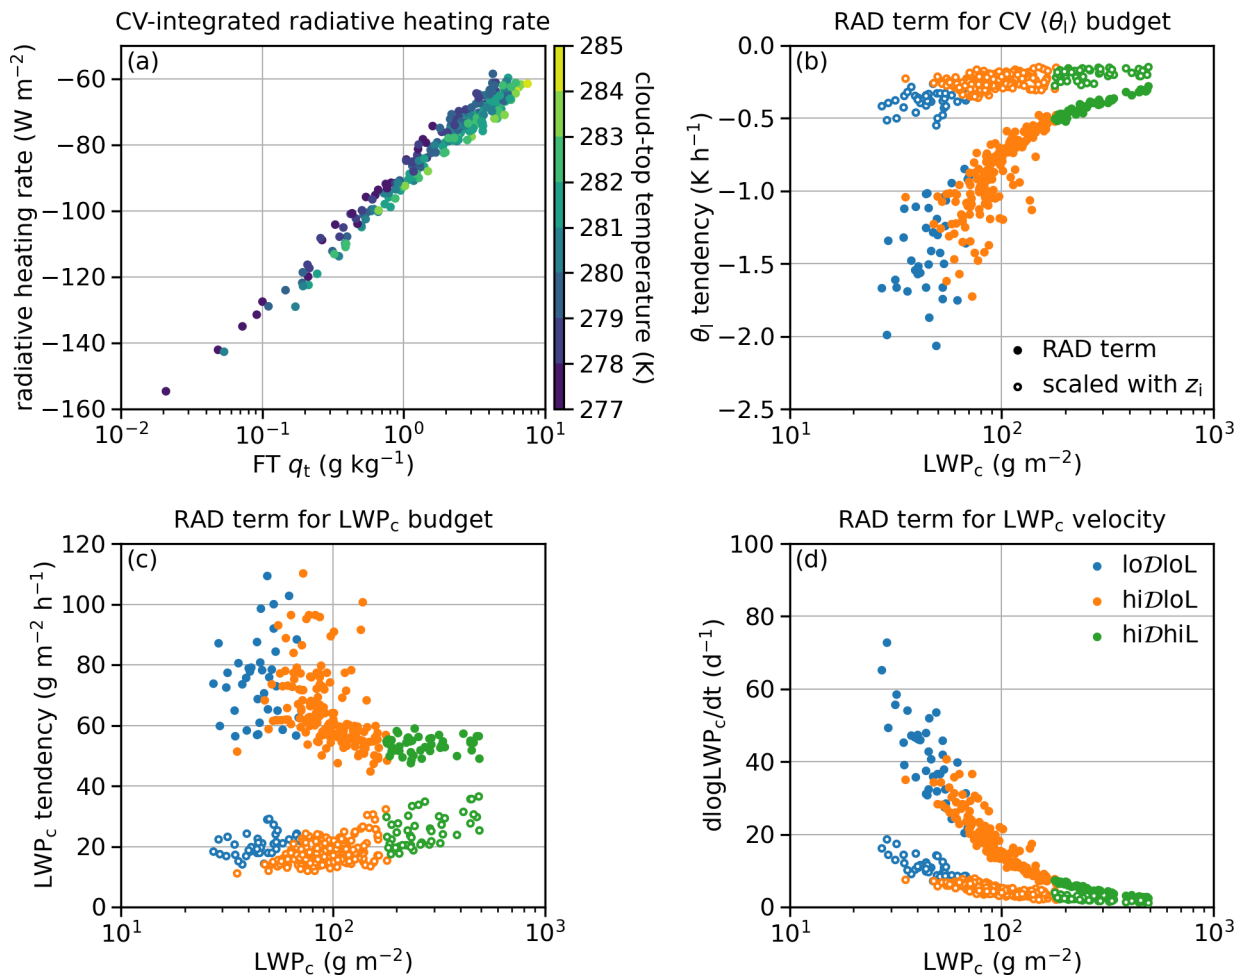

**Figure S15.** Same as Figure 9 but for the SST0.5K+ set.



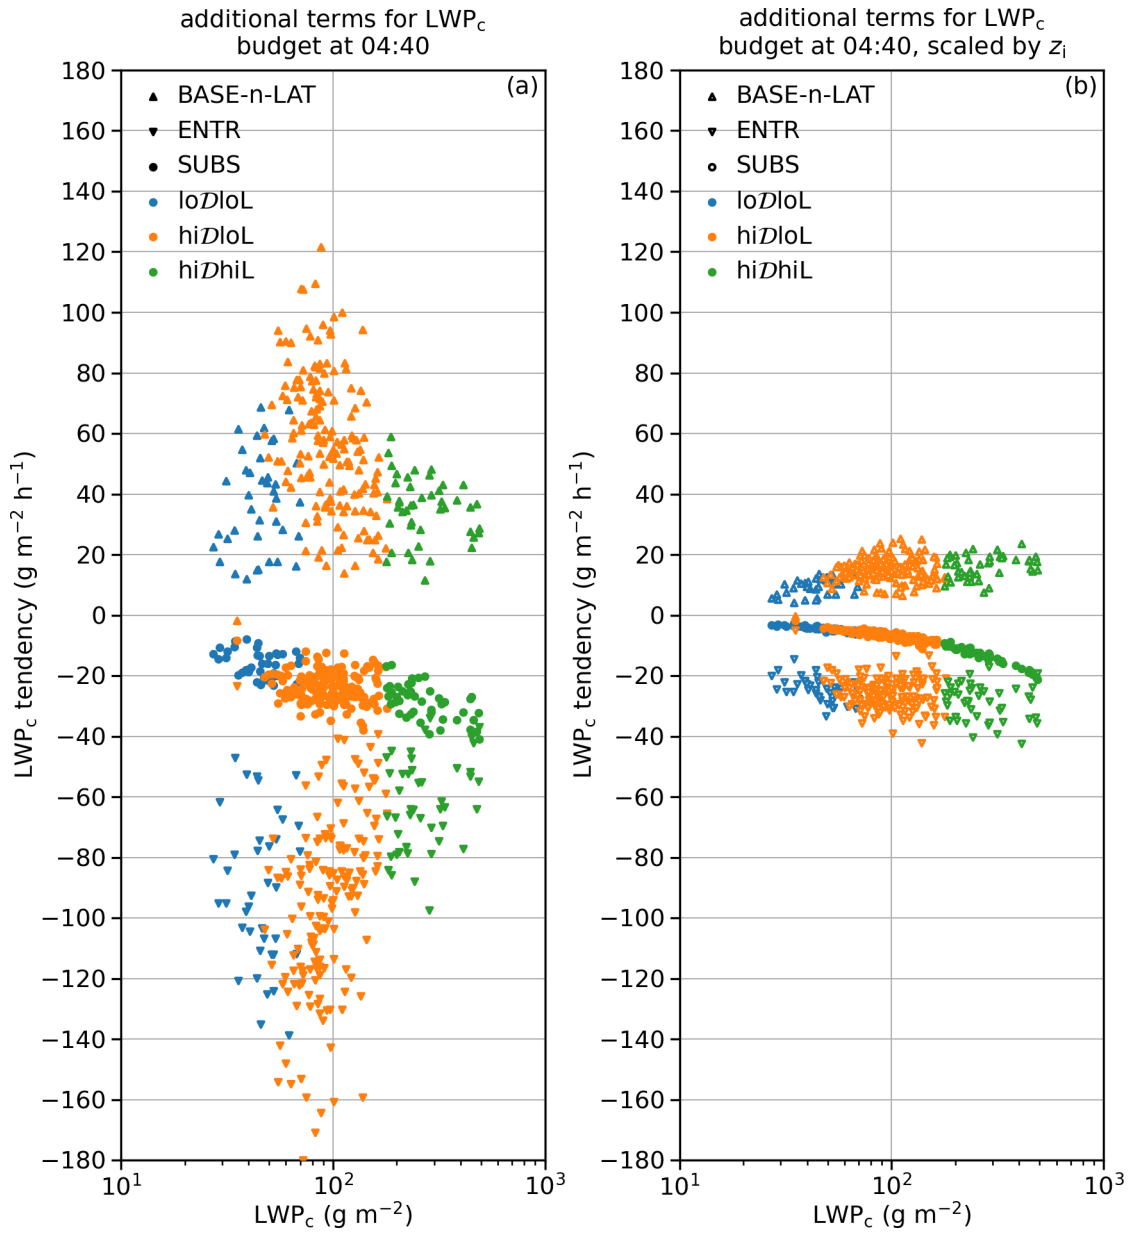

Figure S16. Same as Figure 10 but for the SST0.5K+ set.

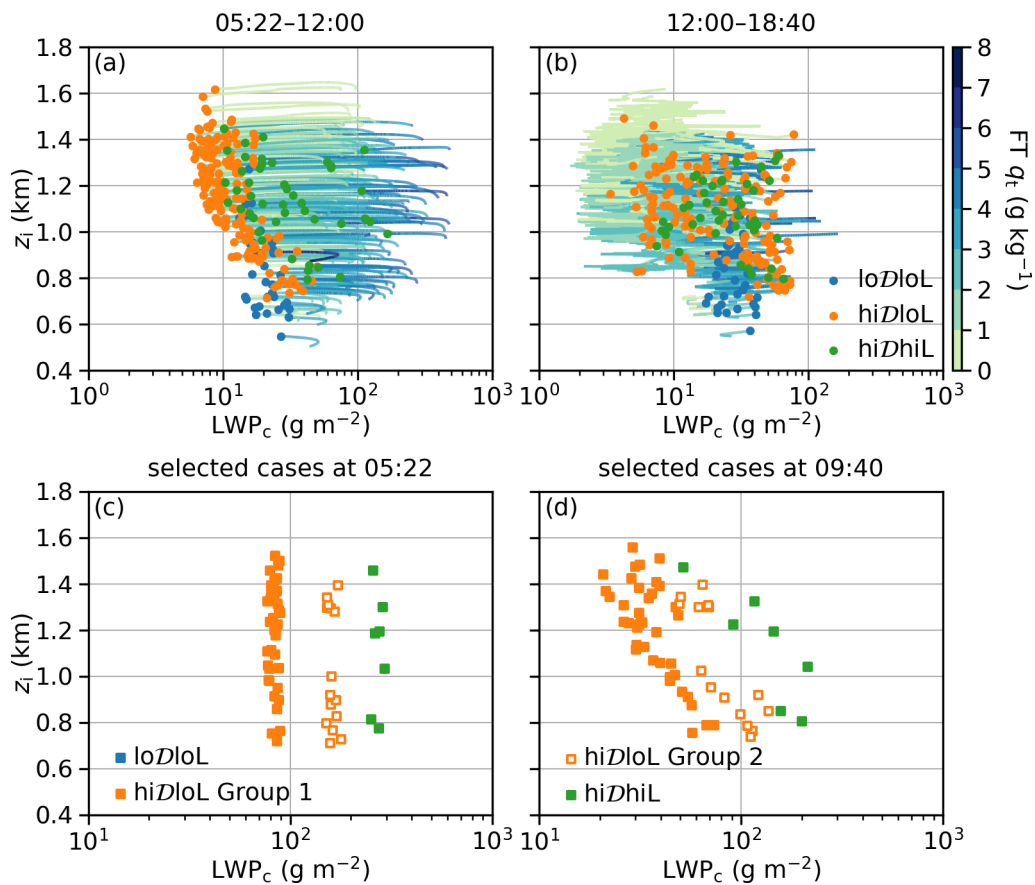

**Figure S17.** Same as Figure 11 but for the SST0.5K+ set.
